# Supplementary material for: Truncating SRCAP variants outside the Floating-Harbor syndrome locus cause a distinct neurodevelopmental disorder with a specific DNA methylation signature
Source: PubMed Central journal article supplement — Am J Hum Genet. 2021 Apr 27;108(6):1053–68. doi: 10.1016/j.ajhg.2021.04.008 (PMC8206150; doi:10.1016/j.ajhg.2021.04.008), 2021-04-27
Supplement: mmc1.pdf [file mmc1.pdf]

## Supplemental information

### Truncating *SRCAP* variants outside the Floating-Harbor syndrome locus cause a distinct neurodevelopmental disorder with a specific DNA methylation signature

Dmitrijs Rots, Eric Chater-Diehl, Alexander J.M. Dingemans, Sarah J. Goodman, Michelle T. Siu, Cheryl Cytrynbaum, Sanaa Choufani, Ny Hoang, Susan Walker, Zain Awamleh, Joshua Charkow, Stephen Meyn, Rolph Pfundt, Tuula Rinne, Thatjana Gardeitchik, Bert B.A. de Vries, A. Chantal Deden, Erika Leenders, Michael Kwint, Constance T.R.M. Stumpel, Servi J.C. Stevens, Jeroen R. Vermeulen, Jeske V.T. van Harssel, Danielle G.M. Bosch, Koen L.I. van Gassen, Ellen van Binsbergen, Christa M. de Geus, Hein Brackel, Maja Hempel, Davor Lessel, Jonas Denecke, Anne Slavotinek, Jonathan Strober, Amy Crunk, Leandra Folk, Ingrid M. Wentzensen, Hui Yang, Fanggeng Zou, Francisca Millan, Richard Person, Yili Xie, Shuxi Liu, Lilian B. Ousager, Martin Larsen, Laura Schultz-Rogers, Eva Morava, Eric W. Klee, Ian R. Berry, Jennifer Campbell, Kristin Lindstrom, Brianna Pruniski, Ann M. Neumeyer, Jessica A. Radley, Chanika Phornphutkul, Berkley Schmidt, William G. Wilson, Katrin Óunap, Karit Reinson, Sander Pajusalu, Arie van Haeringen, Claudia Ruivenkamp, Roos Cuperus, Fernando Santos-Simarro, María Palomares-Bralo, Marta Pacio-Míguez, Alyssa Ritter, Elizabeth Bhoj, Elin Tønne, Kristian Tveten, Gerarda Cappuccio, Nicola Brunetti-Pierri, Leah Rowe, Jason Bunn, Margarita Saenz, Konrad Platzer, Mareike Mertens, Oana Caluseriu, Małgorzata J.M. Nowaczyk, Ronald D. Cohn, Peter Kannu, Ebba Alkhunaizi, David Chitayat, Stephen W. Scherer, Han G. Brunner, Lisenka E.L.M. Vissers, Tjitske Kleefstra, David A. Koolen, and Rosanna Weksberg

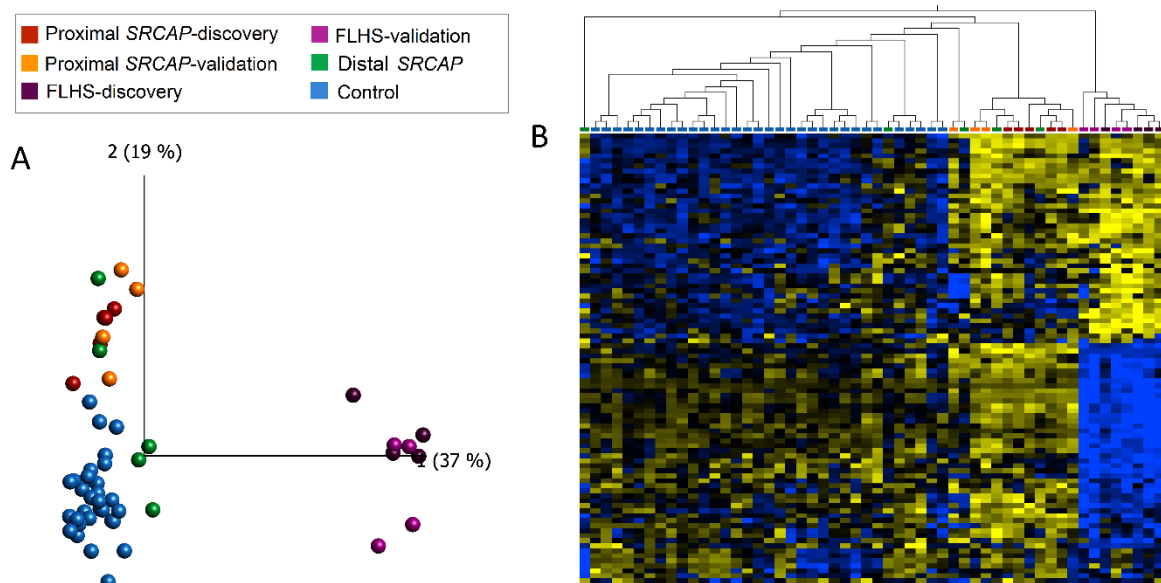

**Figure S1. Clustering of *SRCAP* cohort and control samples using previous DNAm signature.** All plots show the discovery, validation, and test samples used in this study. **A)** PCA using the DNAm values at  $n=99$  CpG sites making up the FLHS DNAm signature from Hood et al., (2016) applied to the samples from the present study. Clustering of all samples is very similar to that of the FLHS signature from this study shown in Figure 1. **B)** The heatmap shows hierarchical clustering of DNAm values at the FLHS signature sites from Hood et al., (2016) for all *SRCAP* samples and discovery controls from the present study. A similar pattern of DNAm to the FLHS signature described in the present study is evident across all samples, including the intermediate, hypermethylated profile of the proximal-*SRCAP* cases. Euclidian distance metric is used for the clustering dendrogram.
